# Supplementary material for: Early-stage serrated adenocarcinomas are divided into several molecularly distinct subtypes
Source: PLoS One. 2019 Feb 20;14(2):e0211477. doi: 10.1371/journal.pone.0211477 (PMC6382106; doi:10.1371/journal.pone.0211477)
Supplement: S6 Table — CCS claficication distincted by immunohistochemistry of CDX2, HTR2B, FRMD6, and ZEB1, and MSI analysis. (XLSX) [file pone.0211477.s014.xlsx]

## Sheet: Sheet1
S6 Table. Comparison between CCS clasification and MSI/MMR associated IHC
Case No.	CCS	CK20 IHC	CK7 IHC	MLH1 IHC
1	CCS1	＋	ー	ー
2	CCS1	＋	ー	ー
3	CCS1	＋	ー	ー
4	CCS1	＋	ー	ー
5	CCS1	＋	ー	ー
6	CCS1	＋	ー	＋
7	CCS1	＋	ー	ー
8	CCS1	＋	ー	ー
9	CCS1	＋	ー	ー
10	CCS1	＋	ー	ー
11	CCS1	＋	ー	ー
12	CCS1	＋	ー	ー
13	CCS1	＋	ー	ー
14	CCS1	＋	ー	＋
15	CCS2	ー	＋	＋
16	CCS2	ー	＋	＋
17	CCS2	ー	＋	＋
18	CCS2	ー	＋	ー
19	CCS2	ー	＋	ー
20	CCS3	＋	ー	＋
21	CCS3	＋	ー	＋
22	CCS3	＋	ー	＋
23	CCS3	＋	ー	＋
24	CCS3	＋	ー	＋
CCS claficication distincted by immunohistochemistry of CDX2, HTR2B, FRMD6, and ZEB1, and MSI analysis
